# Supplementary material
Source: publisher site journal article supplement (https://www.dovepress.com/article/246526)
Supplement: Supplementary file 1 [file get_supplementary_file.php]

Table S1: Descriptive data on the items scores of the Generalized anxiety disorder-7 (GAD-7) scale in Saudi university male students

| Items of the GAD-7 scale | Skewness (SE) | Kurtosis (SE) | Cronbach's Alpha  if Item Deleted | Item-total  correlations | percentage distribution across item scores | | | |
| --- | --- | --- | --- | --- | --- | --- | --- | --- |
| 0 | 1 | 2 | 3 |
| Item-1 | .65 (.18) | -.42 (.35) | .81 | .66* | 38.5 | 37.5 | 18.8 | 5.2 |
| Item-2 | .81 (.18) | -.57 (.35) | .79 | .73* | 51.0 | 22.9 | 19.8 | 5.7 |
| Item-3 | .88 (.18) | -.38 (.35) | .79 | .76* | 52.1 | 25.0 | 18.2 | 3.6 |
| Item-4 | .91 (.18) | -.03 (.35) | .81 | .61* | 49.0 | 31.8 | 14.6 | 3.1 |
| Item-5 | 1.57 (.18) | 1.48 (.35) | .81 | .64* | 65.6 | 18.8 | 8.9 | 5.2 |
| Item-6 | .87 (.18) | -.43 (.35) | .83 | .61* | 49.0 | 25.5 | 16.1 | 8.3 |
| Item-7 | .86 (.18) | -.24 (.35) | .81 | .67* | 46.9 | 30.2 | 16.1 | 5.2 |

SE: Standard Error; **p*<.01

Table S2: Homogeneity - Inter-item correlations of the Generalized anxiety disorder-7 (GAD-7) scale in Saudi university male students

| Items of the  GAD-7 scale | Item-1 | Item-2 | Item-3 | Item-4 | Item-5 | Item-6 | Item-7 |
| --- | --- | --- | --- | --- | --- | --- | --- |
| Item-1 |  | .51* | .50* | .36* | .32* | .30* | .29* |
| Item-2 |  |  | .57* | .36* | .43* | .32* | .41* |
| Item-3 |  |  |  | .43* | .40* | .36* | .50* |
| Item-4 |  |  |  |  | .42* | .22* | .31* |
| Item-5 |  |  |  |  |  | .38* | .44* |
| Item-6 |  |  |  |  |  |  | .34* |
| Item-7 |  |  |  |  |  |  |  |

**p*<.01


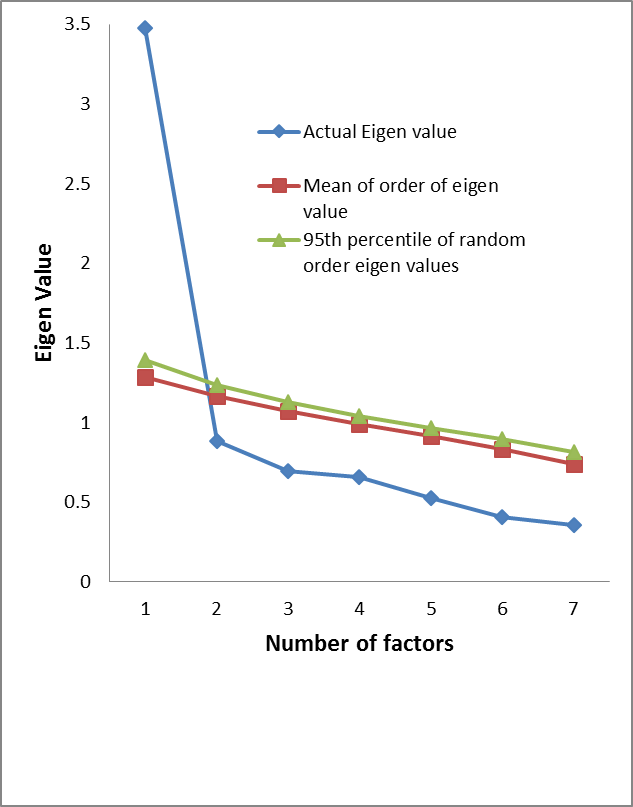


Figure S1: Parallel analysis Sequence plot of the Generalized anxiety disorder-7 (GAD-7) scale in Saudi university male students

**
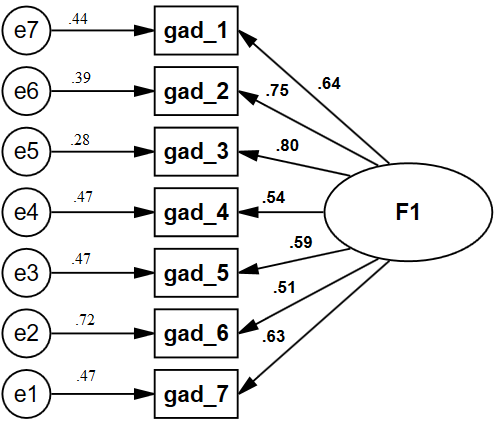
**

Figure S2:Confirmatory factor analysis models of the Generalized anxiety disorder-7 (GAD-7) scale in Saudi university male students. All coefficients are standardized.

gad_1 to gad_7: items of the GAD-7 scale

*Ovals* latent variables, *rectangles* measured variables, *circles* error terms, *single-headed arrows* between *ovals* and *rectangles* factor loadings, *single-headed arrows* between *circles* and *rectangles* error terms, numerical value on the *single-headed arrows* between *circles* and *rectangles*: uniqueness (error terms)

**Figure legends (Supplementary files)**

**Supplementary figure S1** Parallel analysis Sequence plot of the Generalized anxiety disorder-7 (GAD-7) scale in Saudi university male students

**Supplementary figure S2** Confirmatory factor analysis models of the Generalized anxiety disorder-7 (GAD-7) scale in Saudi university male students. All coefficients are standardized.

gad_1 to gad_7: items of the GAD-7 scale

*Ovals* latent variables, *rectangles* measured variables, *circles* error terms, *single-headed arrows* between *ovals* and *rectangles* factor loadings, *single-headed arrows* between *circles* and *rectangles* error terms, numerical value on the *single-headed arrows* between *circles* and *rectangles*: uniqueness (error terms)
